# Supplementary material
Source: Research Square preprint supplement (doi:10.21203/rs.3.rs-8769404/v1)
Supplement: Supplementary file 1 [file a83ed63222a3c5aa22c18535.pdf]

1                   **Supplementary Figures and Supplementary Table for the**  
2                                   **manuscript entitled**  
3                   **“Quantifying climate-mode–driven ocean variability reveals**  
4                                   **intensified sea-level rise”**

5  
6 Shengdao Wang<sup>1</sup>, C. K. Shum<sup>1</sup>, Michael Bevis<sup>1</sup>, Jean-Philippe Montillet<sup>2</sup>, Yihang Ding<sup>3</sup>

7       1. Division of Geodetic Science, School of Earth Sciences, The Ohio State University,  
8       Columbus, Ohio, USA.

9       2. Instituto Dom Luiz, University of Beira Interior, Covilhã, Portugal.

10      3. Department of Hydraulic Engineering, Tsinghua University, Beijing, China.

11  
12 **Correspondence:** Shengdao Wang (shengdaowang123456@gmail.com) and C. K. Shum (ck.shum@outlook.com)

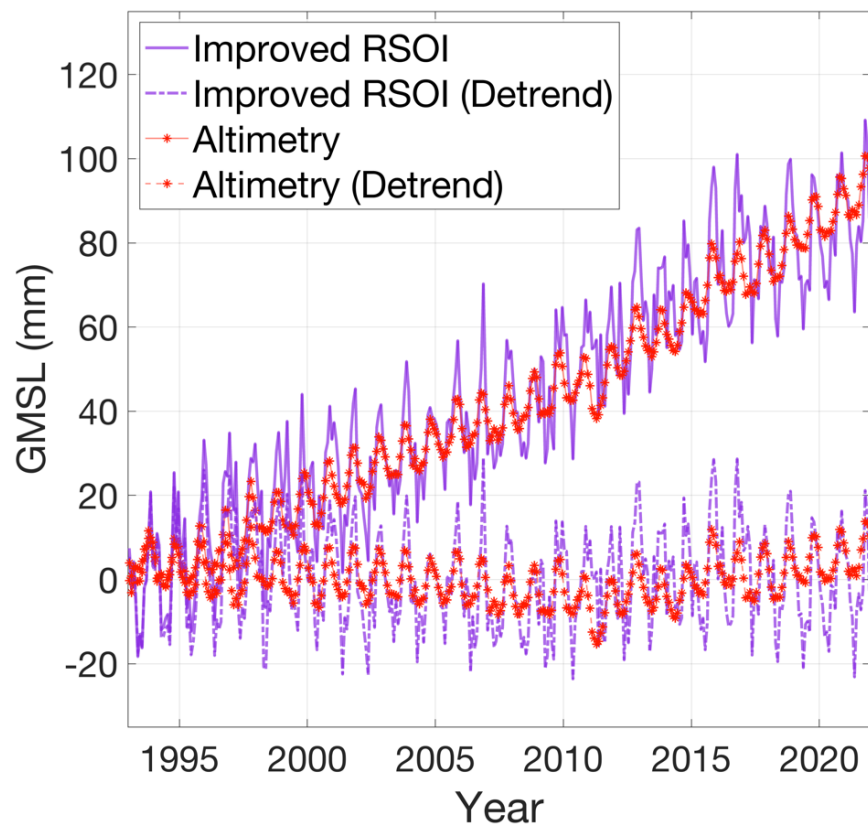

16  
17 **Supplementary Fig. 1 | Monthly global-mean sea level (GMSL) from the improved RSOI**  
18 **reconstruction and AVISO satellite altimetry during the common data span (January 1993–December**  
19 **2021). Solid lines show the original time series; dashed lines show the series after linear detrending.**

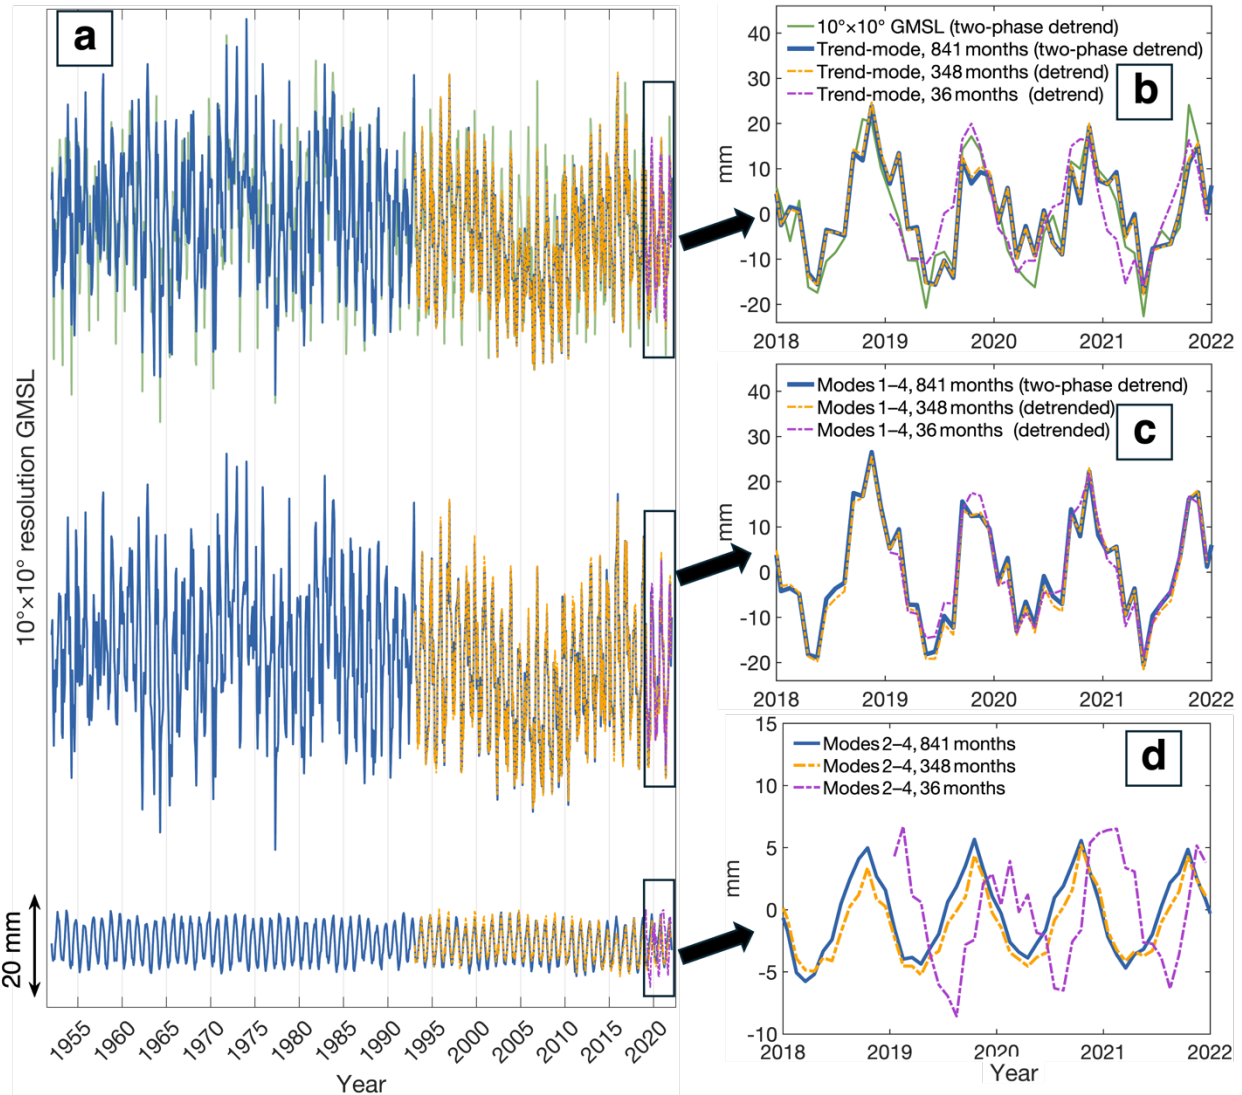

20  
 21 **Supplementary Fig. 2 | Record-length sensitivity (global mean) of EOF modes using  $10^\circ \times 10^\circ$ -**  
 22 **resolution reconstructed sea level. a**, GMSL component of Mode 1 (trend mode; two-phase detrended  
 23 pre- and post-January 1993), the sum of Modes 1–4, and the sum of Modes 2–4, each computed from  
 24 EOF analysis on the full record (January 1952–January 2022, 841 months), the altimetry-era subset  
 25 (January 1993–December 2021; 348 months), and a short subset (January 2019–December 2021; 36  
 26 months). **b–d**, Zoom in for 2019–2021 showing (b) Mode 1, (c) sum of Modes 1–4, and (d) sum of Modes  
 27 2–4. The 348-month solutions closely track the 841-month reference in the common data span.

28  
 29  
 30  
 31

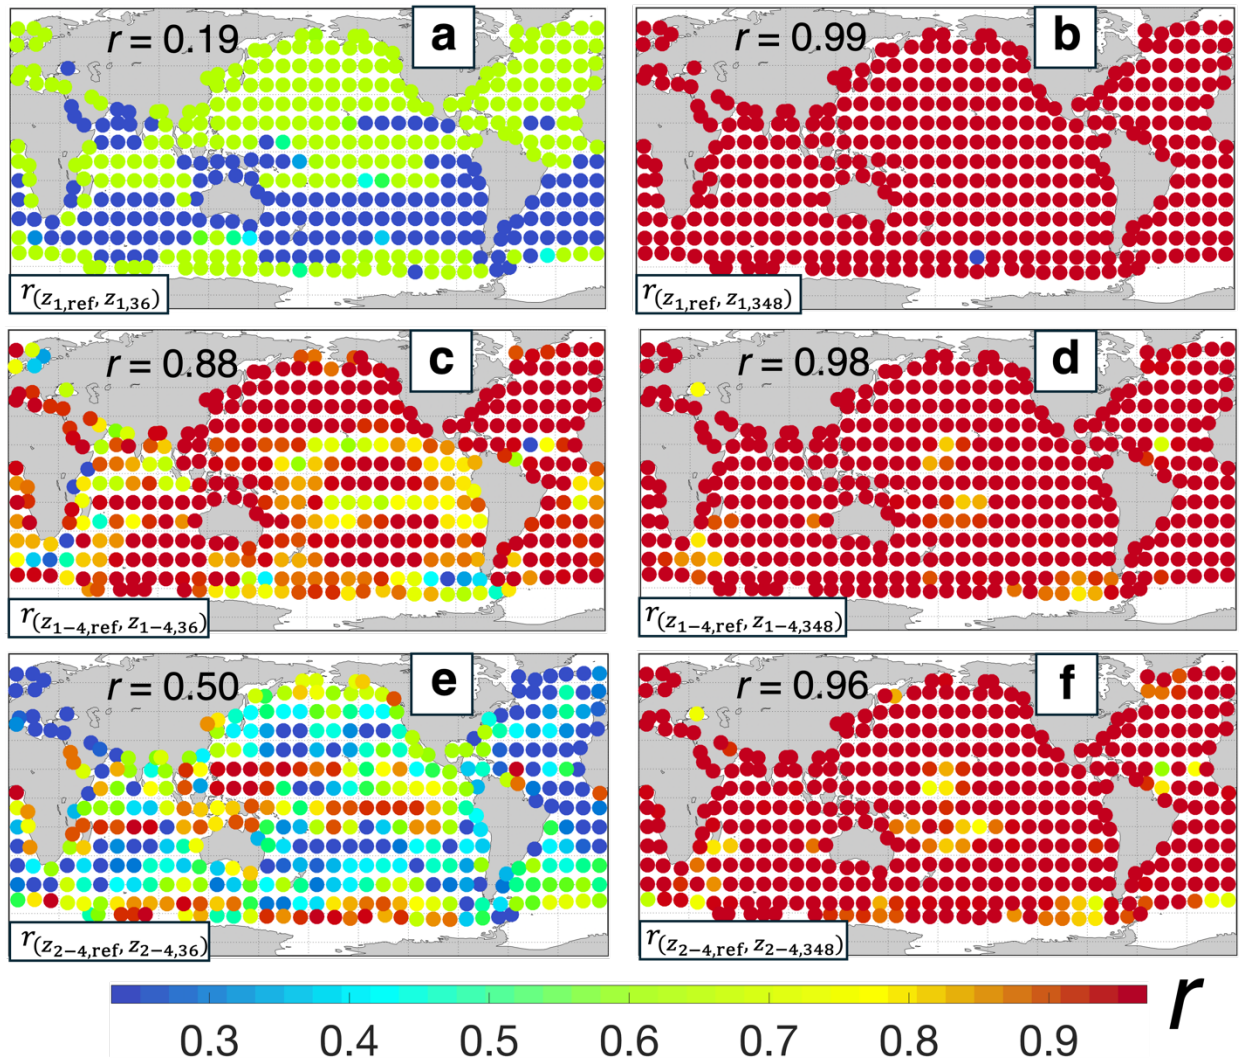

32

33 **Supplementary Fig. 3 | Correlation coefficients ( $r$ ) between truncated records and the 841-month**  
 34 **reference on each  $10^\circ \times 10^\circ$  grid. a,b, Mode 1: correlations between truncated windows and the reference**  
 35 **(January 1952-January 2022) over the common data span - a, 36 months (January 2019- December**  
 36 **2021); b, 348 months (January 1993- December 2021). c,d, Sum of Modes 1-4 for the same two windows.**  
 37 **e,f, Sum of Modes 2-4 for the same two windows. Averaged correlation  $r$  is shown at the top left of each**  
 38 **panel. Mode 1 is two-phase-detrended (pre- and post January 1993) before comparison; 36- and 348-**  
 39 **month records use trends matched to the detrended Mode 1 within the common span.**

40

41

42

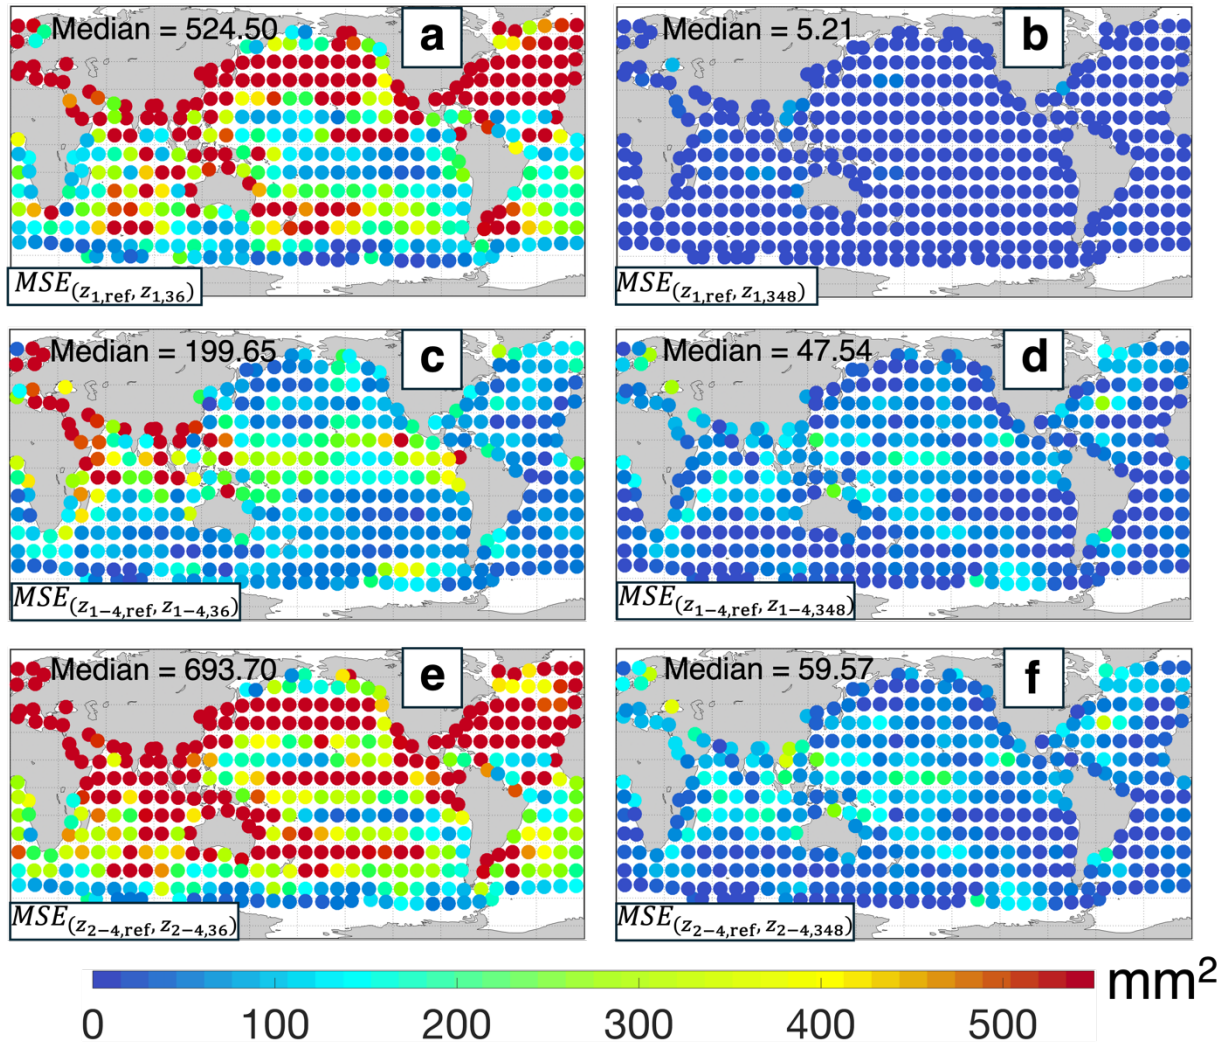

43

44 *Supplementary Fig. 4 | Mean squared error (MSE) with the 841-month reference on the  $10^\circ \times 10^\circ$  grid.*

45 *a,b, Mode 1 MSE between truncated records and the reference: a, 36 months (January 2019–December*

46 *2021); b, 348 months (January 1993–December 2021). c,d, Sum of Modes 1–4 for the same windows. e,f,*

47 *Sum of Modes 2–4 for the same windows. Median MSE is shown at the upper left of each panel.*

48

49

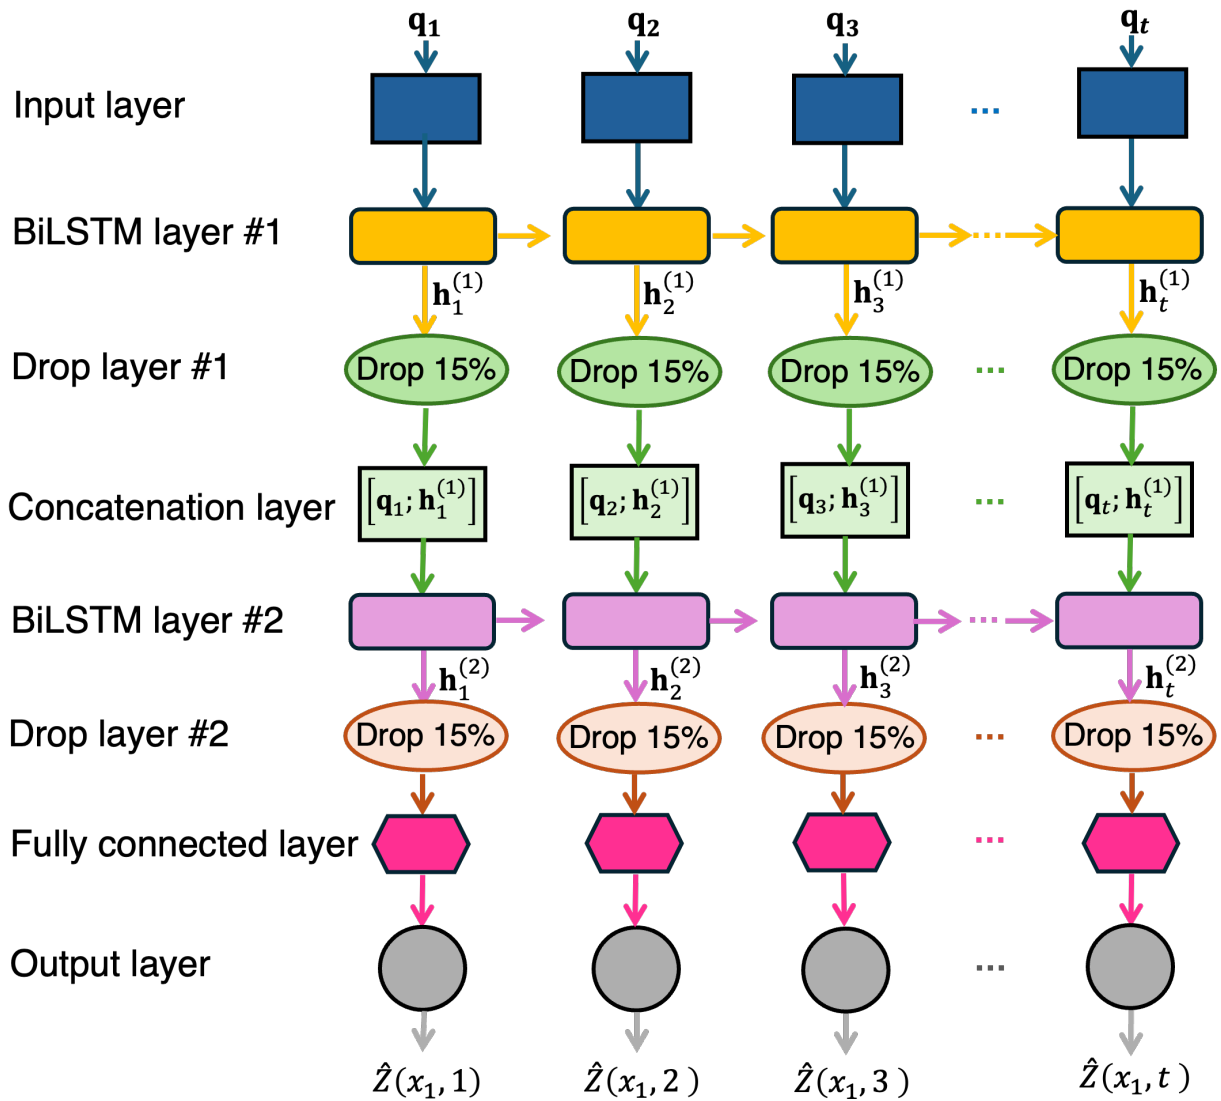

50

51 *Supplementary Fig. 5 | Architecture of the two-layer skip-fusion BiLSTM (2SF-BiLSTM) used to*  
 52 *calibrate sea-level EOF-mode estimates.*

53

54

55

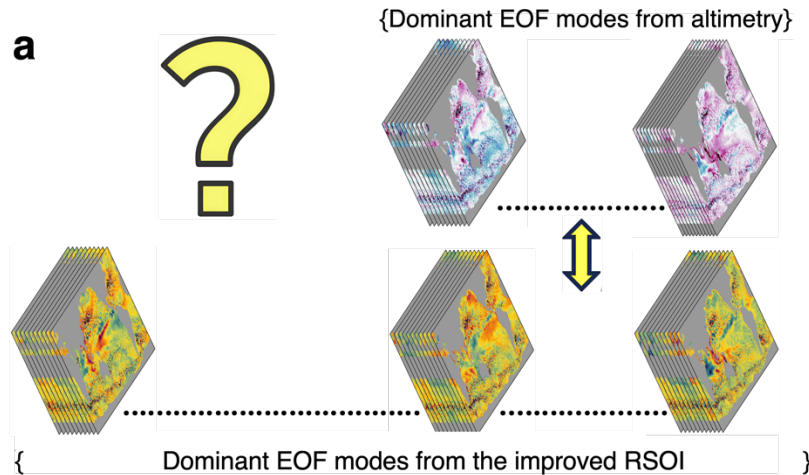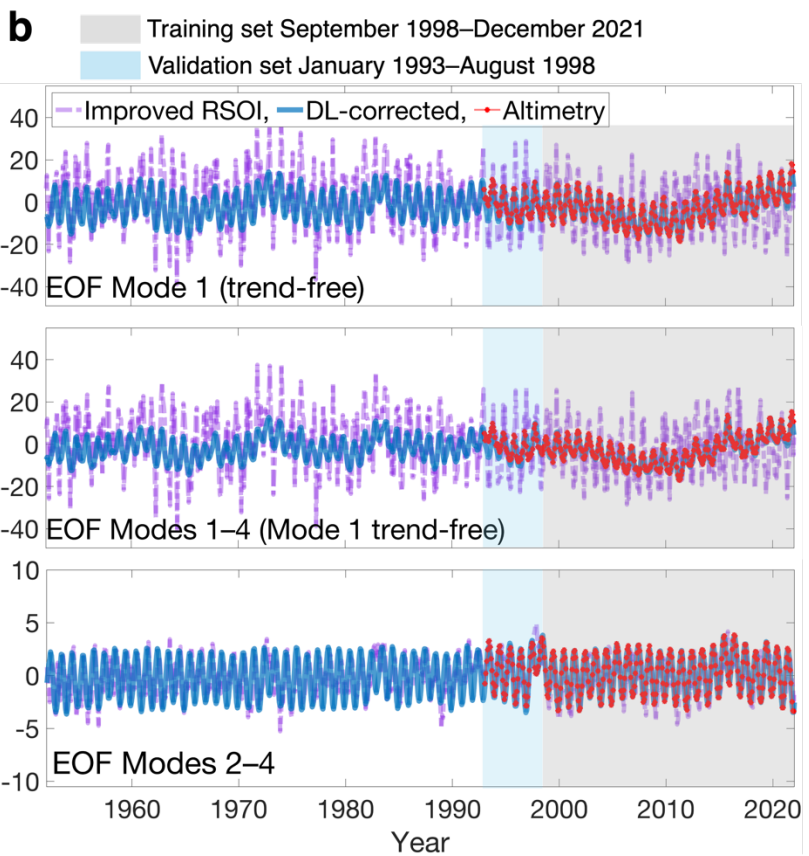

56

57 **Supplementary Fig. 6 | Deep-learning training framework and global-mean EOF comparisons before**  
 58 **and after calibration. a, Schematic: majority EOF modes (upper) from altimetry sea-level anomaly and**  
 59 **the corresponding EOF modes from the improved RSOI reconstruction (lower). b, Global-mean time**  
 60 **series for Mode 1, sum of Modes 1–4, and sum of Modes 2–4 from improved RSOI before and after**  
 61 **applying 2SF-BiLSTM deep-learning calibration. Mode 1 from improved RSOI is two-phase detrended,**  
 62 **with a breakpoint at January 1993; the altimetry Mode 1 trend matches the two-phase-detrended**  
 63 **improved RSOI Mode 1 during their overlap. Training and validation period highlighted in shading.**

64 **Supplementary Table 1 | Performance of deep-learning models at each  $1^\circ \times 1^\circ$  grid for the validation**  
 65 **set (January 1993–August 1998).** The deep-learning models (TCN, self-attention, and 2SF-BiLSTM) are  
 66 trained to calibrate the reconstructed sum of EOF Modes 1–4 (Mode 1 detrended) against the  
 67 corresponding altimetry-derived series. Metrics ( $r^2$ , MSE, and MAE) are computed at each grid cell and  
 68 then averaged globally. The uncalibrated improved RSOI results are shown for comparison.

| <i>Algorithms</i>                                             | <i>TCN</i>                   | <i>Self-attention</i>        | <i>2SF-BiLSTM</i>           | <i>Improved RSOI</i>         |
|---------------------------------------------------------------|------------------------------|------------------------------|-----------------------------|------------------------------|
| <i>Comparison</i>                                             |                              |                              |                             |                              |
| <i>Averaged <math>r^2</math> with target altimetry series</i> | <b>0.87</b>                  | <b>0.91</b>                  | <b>0.95</b>                 | <b>0.70</b>                  |
| <i>Averaged MSE with target altimetry series</i>              | <b>139.18 mm<sup>2</sup></b> | <b>243.17 mm<sup>2</sup></b> | <b>77.21 mm<sup>2</sup></b> | <b>432.97 mm<sup>2</sup></b> |
| <i>Averaged MAE with target altimetry series</i>              | <b>8.21 mm</b>               | <b>9.68 mm</b>               | <b>5.94 mm</b>              | <b>15.32 mm</b>              |

69
